# Supplementary material for: ﻿Phylogenetic classification of arbuscular mycorrhizal fungi: new species and higher-ranking taxa in Glomeromycota and Mucoromycota (class Endogonomycetes)
Source: PubMed Central journal article supplement (PMC11336396; doi:10.3897/mycokeys.107.125549), 2024-08-09

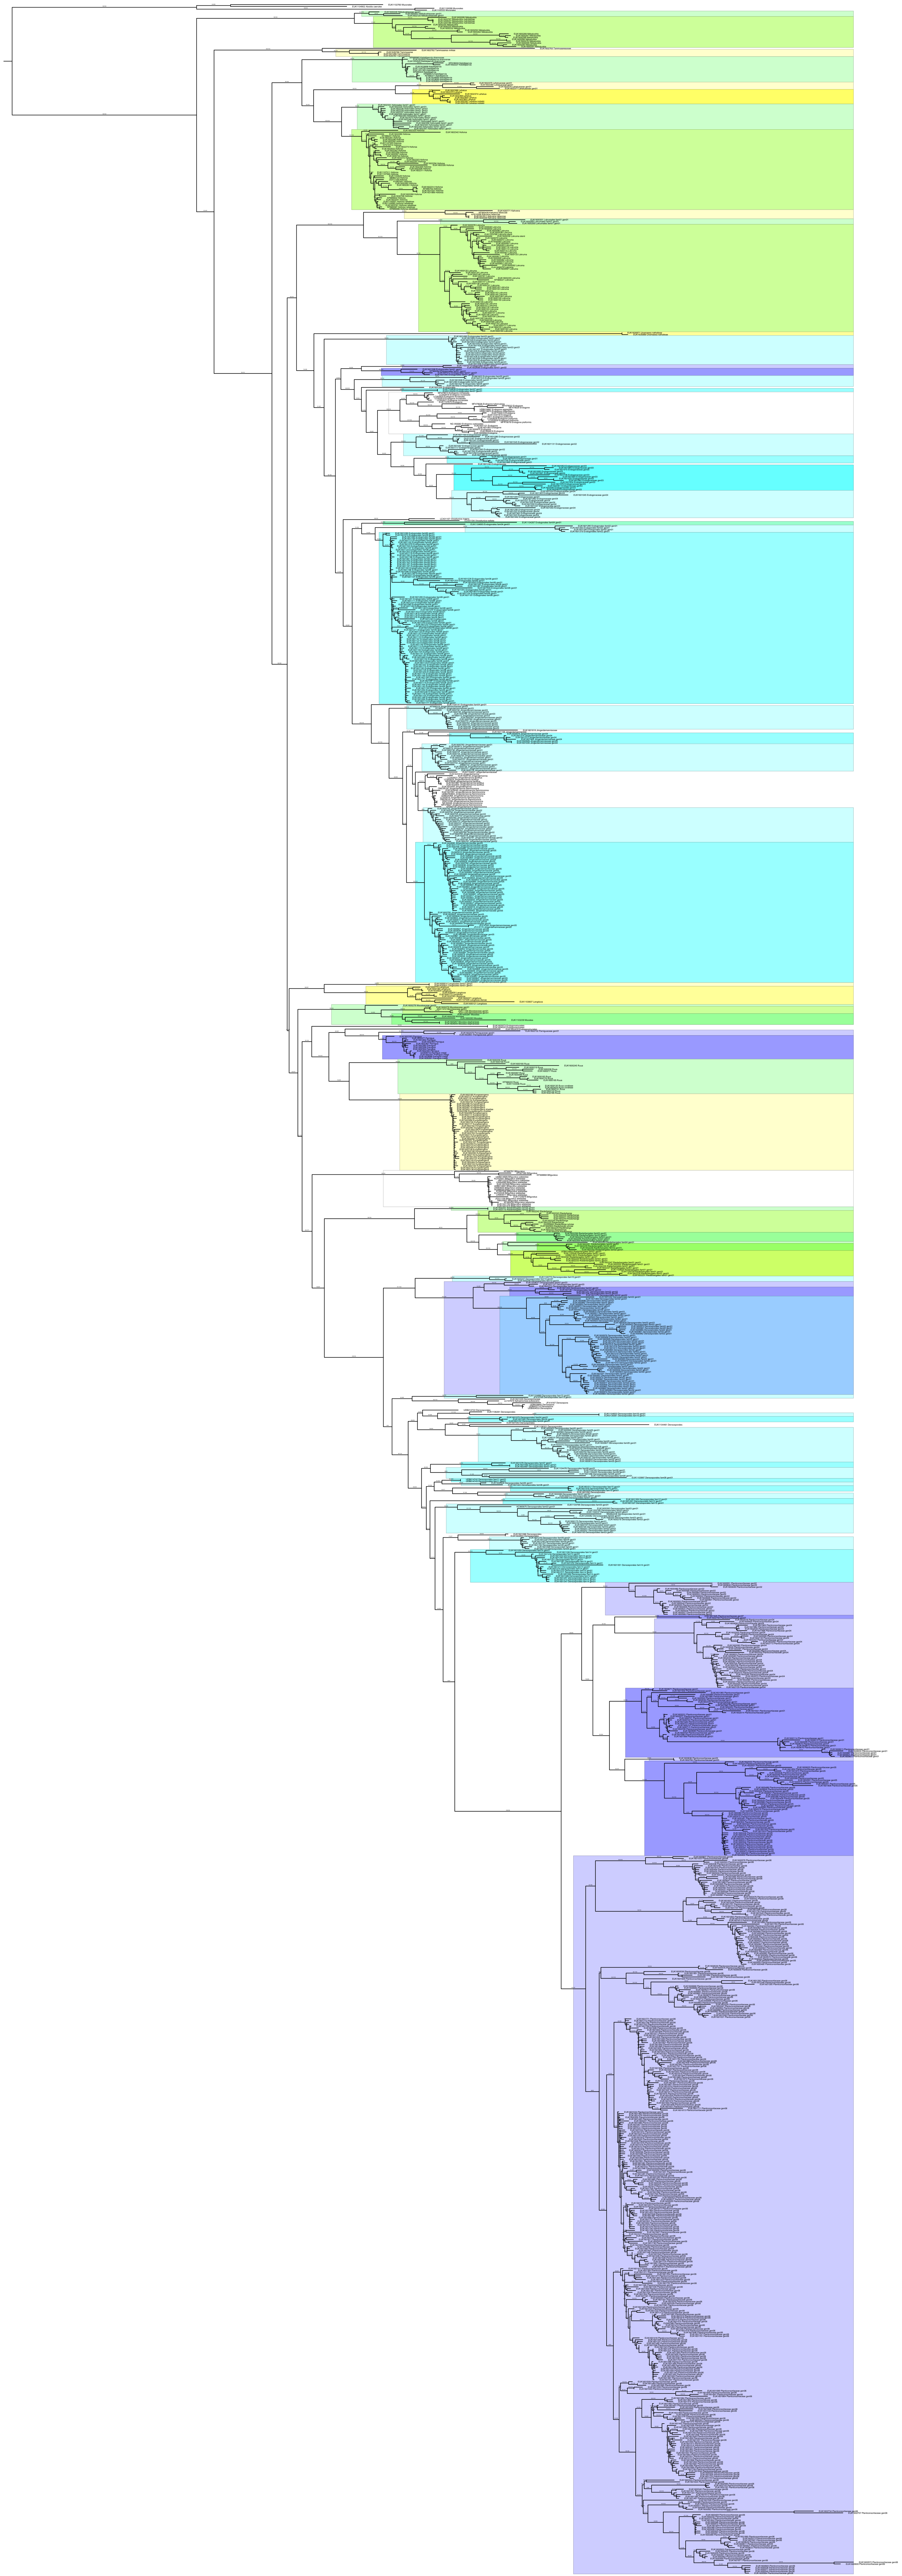

Supplement: mycokeys-107-273-s003.pdf [file mycokeys-107-273-s003.pdf]
