# Supplementary material for: ﻿Phylogenetic classification of arbuscular mycorrhizal fungi: new species and higher-ranking taxa in Glomeromycota and Mucoromycota (class Endogonomycetes)
Source: PubMed Central journal article supplement (PMC11336396; doi:10.3897/mycokeys.107.125549), 2024-08-09
Supplement: mycokeys-107-273-s005.pdf [file mycokeys-107-273-s005.pdf]

**Table S1.** Currently recognised orders, families and genera and proposed taxonomic groups in *Glomeromycota*.

| Order                   | Family                         | Genus                                                                              |
|-------------------------|--------------------------------|------------------------------------------------------------------------------------|
| <i>Archaeosporales</i>  | <i>Ambisporaceae</i>           | <i>Ambispora</i> C.Walker, Vestberg & A.Schüssler                                  |
| <i>Archaeosporales</i>  | <i>Archaeosporaceae</i>        | <i>Archaeospora</i> J.B.Morton & D.Redecker                                        |
| <i>Archaeosporales</i>  | <i>Geosiphonaceae</i>          | <i>Geosiphon</i> F.Wettst.                                                         |
| <i>Archaeosporales</i>  | <i>Polonosporaceae</i>         | <i>Polonospora</i> Błaszk., Niezgodna, B.T.Goto & Magurno                          |
| <i>Archaeosporales</i>  | <i>Archaeosporaceae</i>        | <i>Archaeosporaceae_gen01</i>                                                      |
| <i>Archaeosporales</i>  | <i>Archaeosporaceae</i>        | <i>Archaeosporaceae_gen02</i>                                                      |
| <i>Diversisporales</i>  | <i>Acaulosporaceae</i>         | <i>Acaulospora</i> Gerd. & Trappe                                                  |
| <i>Diversisporales</i>  | <i>Diversisporaceae</i>        | <i>Desertispora</i> Błaszk., Kozłowska, Ryszka, Al-Yahya'ei & Symanczik            |
| <i>Diversisporales</i>  | <i>Diversisporaceae</i>        | <i>Diversispora</i> C.Walker & A.Schüßler                                          |
| <i>Diversisporales</i>  | <i>Diversisporaceae</i>        | <i>Diversisporaceae_gen01</i>                                                      |
| <i>Diversisporales</i>  | <i>Diversisporaceae</i>        | <i>Diversisporaceae_gen02</i>                                                      |
| <i>Diversisporales</i>  | <i>Diversisporaceae</i>        | <i>Redeckera</i> C.Walker & A.Schüßler                                             |
| <i>Diversisporales</i>  | <i>Diversisporaceae</i>        | <i>Sieverdingia</i> Błaszk., Niezgodna & B.T.Goto                                  |
| <i>Diversisporales</i>  | <i>Pacisporaceae</i>           | <i>Pacispora</i> Sieverd. & Oehl                                                   |
| <i>Diversisporales</i>  | <i>Sacculosporaceae</i>        | <i>Sacculospora</i> Oehl, Sieverd., G.A.Silva, B.T.Goto, I.C.Sánchez & Palenzuela  |
| <i>Entrophosporales</i> | <i>Entrophosporaceae</i>       | <i>Entrophospora</i> Oehl, Sieverd., G.A.Silva, B.T.Goto, I.C.Sánchez & Palenzuela |
| <i>Entrophosporales</i> | <i>Pseudoentrophosporaceae</i> | <i>Pseudoentrophospora</i> Tedersoo & Magurno                                      |

|                     |                             |                                                                   |
|---------------------|-----------------------------|-------------------------------------------------------------------|
| <i>Gigasporales</i> | <i>Gigasporaceae</i>        | <i>Bulbospora</i> Oehl & G.A.Silva                                |
| <i>Gigasporales</i> | <i>Dentiscutataceae</i>     | <i>Dentiscutata</i> Sieverd., F.A.Souza & Oehl                    |
| <i>Gigasporales</i> | <i>Dentiscutataceae</i>     | <i>Fuscutata</i> Oehl, F.A.Souza & Sieverd.                       |
| <i>Gigasporales</i> | <i>Gigasporaceae</i>        | <i>Gigaspora</i> Gerd. & Trappe                                   |
| <i>Gigasporales</i> | <i>Intraornatosporaceae</i> | <i>Intraornatospora</i> B.T.Goto, Oehl & G.A.Silva                |
| <i>Gigasporales</i> | <i>Intraornatosporaceae</i> | <i>Paradentiscutata</i> B.T.Goto, Oehl & G.A.Silva                |
| <i>Gigasporales</i> | <i>Racocetraceae</i>        | <i>Cetraspora</i> Oehl, F.A.Souza & Sieverd.                      |
| <i>Gigasporales</i> | <i>Racocetraceae</i>        | <i>Racocetra</i> Oehl, F.A.Souza & Sieverd.                       |
| <i>Gigasporales</i> | <i>Scutellosporaceae</i>    | <i>Scutellospora</i> C.Walker & F.E.Sanders                       |
| <i>Gigasporales</i> | <i>Scutellosporaceae</i>    | <i>Orbispora</i> Oehl, G.A.Silva & D.K.Silva                      |
| <i>Glomerales</i>   | <i>Glomeraceae</i>          | <i>Complexispora</i> Błaszk., B.T.Goto, Niezgodna & Magurno       |
| <i>Glomerales</i>   | <i>Glomeraceae</i>          | <i>Dominikia</i> Błaszk., Chwat & Kovács                          |
| <i>Glomerales</i>   | <i>Glomeraceae</i>          | <i>Epigeocarpum</i> Błaszk., B.T.Goto, Jobim, Niezgodna & Marguno |
| <i>Glomerales</i>   | <i>Glomeraceae</i>          | <i>Funneliformis</i> C.Walker & A.Schüßler                        |
| <i>Glomerales</i>   | <i>Glomeraceae</i>          | <i>Funneliglomus</i> Corazon-Guivin, G.A.Silva & Oehl             |
| <i>Glomerales</i>   | <i>Glomeraceae</i>          | <i>Glomeraceae_gen01</i>                                          |
| <i>Glomerales</i>   | <i>Glomeraceae</i>          | <i>Glomeraceae_gen02</i>                                          |
| <i>Glomerales</i>   | <i>Glomeraceae</i>          | <i>Glomeraceae_gen03</i>                                          |
| <i>Glomerales</i>   | <i>Glomeraceae</i>          | <i>Glomeraceae_gen04</i>                                          |

|                   |                    |                          |
|-------------------|--------------------|--------------------------|
| <i>Glomerales</i> | <i>Glomeraceae</i> | <i>Glomeraceae_gen05</i> |
| <i>Glomerales</i> | <i>Glomeraceae</i> | <i>Glomeraceae_gen06</i> |
| <i>Glomerales</i> | <i>Glomeraceae</i> | <i>Glomeraceae_gen07</i> |
| <i>Glomerales</i> | <i>Glomeraceae</i> | <i>Glomeraceae_gen08</i> |
| <i>Glomerales</i> | <i>Glomeraceae</i> | <i>Glomeraceae_gen09</i> |
| <i>Glomerales</i> | <i>Glomeraceae</i> | <i>Glomeraceae_gen10</i> |
| <i>Glomerales</i> | <i>Glomeraceae</i> | <i>Glomeraceae_gen11</i> |
| <i>Glomerales</i> | <i>Glomeraceae</i> | <i>Glomeraceae_gen12</i> |
| <i>Glomerales</i> | <i>Glomeraceae</i> | <i>Glomeraceae_gen13</i> |
| <i>Glomerales</i> | <i>Glomeraceae</i> | <i>Glomeraceae_gen14</i> |
| <i>Glomerales</i> | <i>Glomeraceae</i> | <i>Glomeraceae_gen15</i> |
| <i>Glomerales</i> | <i>Glomeraceae</i> | <i>Glomeraceae_gen16</i> |
| <i>Glomerales</i> | <i>Glomeraceae</i> | <i>Glomeraceae_gen17</i> |
| <i>Glomerales</i> | <i>Glomeraceae</i> | <i>Glomeraceae_gen18</i> |
| <i>Glomerales</i> | <i>Glomeraceae</i> | <i>Glomeraceae_gen19</i> |
| <i>Glomerales</i> | <i>Glomeraceae</i> | <i>Glomeraceae_gen20</i> |
| <i>Glomerales</i> | <i>Glomeraceae</i> | <i>Glomeraceae_gen21</i> |
| <i>Glomerales</i> | <i>Glomeraceae</i> | <i>Glomeraceae_gen22</i> |
| <i>Glomerales</i> | <i>Glomeraceae</i> | <i>Glomeraceae_gen23</i> |

|                   |                    |                                                                        |
|-------------------|--------------------|------------------------------------------------------------------------|
| <i>Glomerales</i> | <i>Glomeraceae</i> | <i>Glomeraceae_gen24</i>                                               |
| <i>Glomerales</i> | <i>Glomeraceae</i> | <i>Glomeraceae_gen25</i>                                               |
| <i>Glomerales</i> | <i>Glomeraceae</i> | <i>Glomeraceae_gen26</i>                                               |
| <i>Glomerales</i> | <i>Glomeraceae</i> | <i>Glomeraceae_gen27</i>                                               |
| <i>Glomerales</i> | <i>Glomeraceae</i> | <i>Glomeraceae_gen28</i>                                               |
| <i>Glomerales</i> | <i>Glomeraceae</i> | <i>Glomeraceae_gen29</i>                                               |
| <i>Glomerales</i> | <i>Glomeraceae</i> | <i>Glomeraceae_gen30</i>                                               |
| <i>Glomerales</i> | <i>Glomeraceae</i> | <i>Glomus</i> Tul. & C.Tul.                                            |
| <i>Glomerales</i> | <i>Glomeraceae</i> | <i>Halonatospora</i> Błaszcz., Niezgodna, B.T.Goto & Kozłowska         |
| <i>Glomerales</i> | <i>Glomeraceae</i> | <i>Kamienskia</i> Błaszcz., Chwat & Kovács                             |
| <i>Glomerales</i> | <i>Glomeraceae</i> | <i>Microdominikia</i> Oehl, Corazon-Guivin & G.A.Silva                 |
| <i>Glomerales</i> | <i>Glomeraceae</i> | <i>Microkamienskia</i> Corazon-Guivin, G.A.Silva & Oehl                |
| <i>Glomerales</i> | <i>Glomeraceae</i> | <i>Nanoglomus</i> Corazon-Guivin, G.A.Silva & Oehl                     |
| <i>Glomerales</i> | <i>Glomeraceae</i> | <i>Oehlia</i> Błaszcz., Kozłowska, Niezgodna, B.T.Goto & Dalpé         |
| <i>Glomerales</i> | <i>Glomeraceae</i> | <i>Orientoglomus</i> G.A.Silva, Oehl & Corazon-Guivin                  |
| <i>Glomerales</i> | <i>Glomeraceae</i> | <i>Parvocarpum</i> Magurno                                             |
| <i>Glomerales</i> | <i>Glomeraceae</i> | <i>Rhizoglomus</i> Sieverd., G.A.Silva & Oehl                          |
| <i>Glomerales</i> | <i>Glomeraceae</i> | <i>Sclerocarpum</i> B.T.Goto, Błaszcz., Niezgodna, A.Kozłowska & Jobim |
| <i>Glomerales</i> | <i>Glomeraceae</i> | <i>Sclerocystis</i> Berk. & Broome                                     |

|                       |                        |                                                                        |
|-----------------------|------------------------|------------------------------------------------------------------------|
| <i>Glomerales</i>     | <i>Glomeraceae</i>     | <i>Septoglomus</i> Sieverd., G.A.Silva & Oehl                          |
| <i>Glomerales</i>     | <i>Glomeraceae</i>     | <i>Silvaspora</i> Błaszcz., Niezgoda, B.T.Goto, Crossay & Magurno      |
| <i>Glomerales</i>     | <i>Glomeraceae</i>     | <i>Viscospora</i> Sieverd., Oehl & G.A.Silva                           |
| <i>Paraglomerales</i> | <i>Paraglomeraceae</i> | <i>Paraglomeraceae_gen01</i>                                           |
| <i>Paraglomerales</i> | <i>Paraglomeraceae</i> | <i>Innospora</i> Błaszcz., Kovács, Chwat & Kozłowska                   |
| <i>Paraglomerales</i> | <i>Paraglomeraceae</i> | <i>Paraglomus</i> J.B.Morton & D.Redecker                              |
| <i>Paraglomerales</i> | <i>Pervetustaceae</i>  | <i>Pervetustus</i> Błaszcz., Chwat, Kozłowska, Symanczik & Al-Yahya'ei |
