# Supplementary material for: ﻿Phylogenetic classification of arbuscular mycorrhizal fungi: new species and higher-ranking taxa in Glomeromycota and Mucoromycota (class Endogonomycetes)
Source: PubMed Central journal article supplement (PMC11336396; doi:10.3897/mycokeys.107.125549), 2024-08-09
Supplement: mycokeys-107-273-s006.pdf [file mycokeys-107-273-s006.pdf]

**Table S2.** Currently recognised orders, families and genera and proposed taxonomic groups in *Endogonomycetes*.

| Order                | Family                     | Genus                            |
|----------------------|----------------------------|----------------------------------|
| <i>Densosporales</i> | <i>Densosporaceae</i>      | <i>Densospora</i> McGee          |
| <i>Densosporales</i> | <i>Densosporales</i> fam01 | <i>Densosporales</i> fam01 gen01 |
| <i>Densosporales</i> | <i>Densosporales</i> fam02 | <i>Densosporales</i> fam02 gen01 |
| <i>Densosporales</i> | <i>Densosporales</i> fam02 | <i>Densosporales</i> fam02 gen02 |
| <i>Densosporales</i> | <i>Densosporales</i> fam02 | <i>Densosporales</i> fam02 gen03 |
| <i>Densosporales</i> | <i>Densosporales</i> fam03 | <i>Densosporales</i> fam03 gen01 |
| <i>Densosporales</i> | <i>Densosporales</i> fam04 | <i>Densosporales</i> fam04 gen01 |
| <i>Densosporales</i> | <i>Densosporales</i> fam05 | <i>Densosporales</i> fam05 gen01 |
| <i>Densosporales</i> | <i>Densosporales</i> fam06 | <i>Densosporales</i> fam06 gen01 |
| <i>Densosporales</i> | <i>Densosporales</i> fam07 | <i>Densosporales</i> fam07 gen01 |
| <i>Densosporales</i> | <i>Densosporales</i> fam08 | <i>Densosporales</i> fam08 gen01 |
| <i>Densosporales</i> | <i>Densosporales</i> fam09 | <i>Densosporales</i> fam09 gen01 |
| <i>Densosporales</i> | <i>Densosporales</i> fam10 | <i>Densosporales</i> fam10 gen01 |

|                      |                            |                                               |
|----------------------|----------------------------|-----------------------------------------------|
| <i>Densosporales</i> | <i>Densosporales</i> fam11 | <i>Densosporales</i> fam11 gen01              |
| <i>Densosporales</i> | <i>Densosporales</i> fam12 | <i>Densosporales</i> fam12 gen01              |
| <i>Densosporales</i> | <i>Densosporales</i> fam13 | <i>Densosporales</i> fam13 gen01              |
| <i>Densosporales</i> | <i>Densosporales</i> fam14 | <i>Densosporales</i> fam14 gen01              |
| <i>Densosporales</i> | <i>Densosporales</i> fam15 | <i>Densosporales</i> fam15 gen01              |
| <i>Densosporales</i> | <i>Densosporales</i> fam16 | <i>Densosporales</i> fam16 gen01              |
| <i>Densosporales</i> | <i>Planticonsortiaceae</i> | <i>Planticonsortiaceae</i> gen01              |
| <i>Densosporales</i> | <i>Planticonsortiaceae</i> | <i>Planticonsortiaceae</i> gen02              |
| <i>Densosporales</i> | <i>Planticonsortiaceae</i> | <i>Planticonsortiaceae</i> gen03              |
| <i>Densosporales</i> | <i>Planticonsortiaceae</i> | <i>Planticonsortiaceae</i> gen04              |
| <i>Densosporales</i> | <i>Planticonsortiaceae</i> | <i>Planticonsortiaceae</i> gen05              |
| <i>Densosporales</i> | <i>Planticonsortiaceae</i> | <i>Planticonsortiaceae</i> gen06              |
| <i>Densosporales</i> | <i>Planticonsortiaceae</i> | <i>Planticonsortiaceae</i> gen07              |
| <i>Densosporales</i> | <i>Planticonsortiaceae</i> | <i>Planticonsortium</i> C.Walker & D.Redecker |

|                    |                                |                                        |
|--------------------|--------------------------------|----------------------------------------|
| <i>Endogonales</i> | <i>Endogonaceae</i>            | <i>Endogonaceae</i> gen01              |
| <i>Endogonales</i> | <i>Endogonaceae</i>            | <i>Endogonaceae</i> gen02              |
| <i>Endogonales</i> | <i>Endogonaceae</i>            | <i>Endogonaceae</i> gen03              |
| <i>Endogonales</i> | <i>Endogonaceae</i>            | <i>Endogonaceae</i> gen04              |
| <i>Endogonales</i> | <i>Endogonaceae</i>            | <i>Endogone</i> Link                   |
| <i>Endogonales</i> | <i>Endogonales</i> fam i.sedis | <i>Peridiospora</i> C.G.Wu & Suh J.Lin |
| <i>Endogonales</i> | <i>Endogonales</i> fam i.sedis | <i>Sclerogone</i> Warcup               |
| <i>Endogonales</i> | <i>Endogonales</i> fam01       | <i>Endogonales</i> fam01 gen01         |
| <i>Endogonales</i> | <i>Endogonales</i> fam01       | <i>Endogonales</i> fam01 gen02         |
| <i>Endogonales</i> | <i>Endogonales</i> fam02       | <i>Endogonales</i> fam02 gen01         |
| <i>Endogonales</i> | <i>Endogonales</i> fam03       | <i>Endogonales</i> fam03 gen01         |
| <i>Endogonales</i> | <i>Endogonales</i> fam04       | <i>Endogonales</i> fam04 gen01         |
| <i>Endogonales</i> | <i>Endogonales</i> fam05       | <i>Endogonales</i> fam05 gen01         |
| <i>Endogonales</i> | <i>Endogonales</i> fam06       | <i>Endogonales</i> fam06 gen01         |

|                          |                           |                                                                       |
|--------------------------|---------------------------|-----------------------------------------------------------------------|
| <i>Endogonales</i>       | <i>Endogonales</i> fam06  | <i>Endogonales</i> fam07 gen01                                        |
| <i>Endogonales</i>       | <i>Jimgerdemanniaceae</i> | <i>Jimgerdemannia</i> Trappe, Desirò, M.E.Sm.,<br>Bonito & Bidartondo |
| <i>Endogonales</i>       | <i>Jimgerdemanniaceae</i> | <i>Jimgerdemanniaceae</i> gen01                                       |
| <i>Endogonales</i>       | <i>Jimgerdemanniaceae</i> | <i>Jimgerdemanniaceae</i> gen02                                       |
| <i>Endogonales</i>       | <i>Jimgerdemanniaceae</i> | <i>Jimgerdemanniaceae</i> gen03                                       |
| <i>Endogonales</i>       | <i>Jimgerdemanniaceae</i> | <i>Jimgerdemanniaceae</i> gen04                                       |
| <i>Endogonales</i>       | <i>Jimgerdemanniaceae</i> | <i>Jimgerdemanniaceae</i> gen05                                       |
| <i>Endogonales</i>       | <i>Jimgerdemanniaceae</i> | <i>Sphaerocreas</i> Sacc. & Ellis                                     |
| <i>Endogonales</i>       | <i>Vinositunicaceae</i>   | <i>Vinositunica</i> Koh.Yamam., Degawa &<br>A.Yamada                  |
| <i>Hoforsales</i>        | <i>Hoforsaceae</i>        | <i>Hoforsa</i> Tedersoo                                               |
| <i>Hoforsales</i>        | <i>Hoforsales</i> fam01   | <i>Hoforsales</i> fam01 gen01                                         |
| <i>Kahvenales</i>        | <i>Kahvenaceae</i>        | <i>Kahvena</i> Tedersoo                                               |
| <i>Kelottijaerviales</i> | <i>Kelottijaerviaceae</i> | <i>Kelottijaervia</i> Tedersoo                                        |
| <i>Kungsaenginales</i>   | <i>Kungsaengenaceae</i>   | <i>Kungsaengena</i> Tedersoo                                          |
| <i>Langduoales</i>       | <i>Langduoaceae</i>       | <i>Langduoa</i> Tedersoo                                              |
| <i>Langduoales</i>       | <i>Langduoles</i> fam01   | <i>Langduoaceae</i> fam01 gen01                                       |

|                       |                             |                                   |
|-----------------------|-----------------------------|-----------------------------------|
| <i>Lehetuales</i>     | <i>Lehetuaceae</i>          | <i>Lehetua</i> Tedersoo           |
| <i>Lehetuales</i>     | <i>Lehetuaceae</i>          | <i>Lehetuaceae</i> gen01          |
| <i>Lokrumales</i>     | <i>Lokrumaceae</i>          | <i>Lokruma</i> Tedersoo           |
| <i>Lokrumales</i>     | <i>Lokrumales</i> fam01     | <i>Lokrumales</i> fam01 gen01     |
| <i>Moosteales</i>     | <i>Moosteaceae</i>          | <i>Moostea</i> Tedersoo           |
| <i>Moosteales</i>     | <i>Moosteaceae</i>          | <i>Moosteaceae</i> gen01          |
| <i>Moosteales</i>     | <i>Moosteaceae</i>          | <i>Moosteaceae</i> gen02          |
| <i>Nikkaluoktales</i> | <i>Nikkaluoktaceae</i>      | <i>Nikkaluokta</i> Tedersoo       |
| <i>Nikkaluoktales</i> | <i>Nikkaluoktaceae</i>      | <i>Nikkaluoktaceae</i> gen01      |
| <i>Parniguales</i>    | <i>Parniguaceae</i>         | <i>Parnigua</i> Tedersoo          |
| <i>Parniguales</i>    | <i>Parniguaceae</i>         | <i>Parniguaceae</i> gen01         |
| <i>Riederbergales</i> | <i>Riederbergaceae</i>      | <i>Riederberga</i> Tedersoo       |
| <i>Riederbergales</i> | <i>Riederbergales</i> fam01 | <i>Riederbergales</i> fam01 gen01 |
| <i>Riederbergales</i> | <i>Riederbergales</i> fam02 | <i>Riederbergales</i> fam02 gen01 |
| <i>Riederbergales</i> | <i>Riederbergales</i> fam03 | <i>Riederbergales</i> fam03 gen01 |
| <i>Riederbergales</i> | <i>Riederbergales</i> fam04 | <i>Riederbergales</i> fam04 gen01 |
| <i>Riederbergales</i> | <i>Riederbergales</i> fam05 | <i>Riederbergales</i> fam05 gen01 |

|                      |                       |                            |
|----------------------|-----------------------|----------------------------|
| <i>Ruuales</i>       | <i>Ruuaceae</i>       | <i>Ruua</i> Tedersoo       |
| <i>Ruuales</i>       | <i>Ruuaceae</i>       | <i>Ruuaceae</i> gen01      |
| <i>Tammsaareales</i> | <i>Tammsaareaceae</i> | <i>Tammsaarea</i> Tedersoo |
| <i>Unemaeaeales</i>  | <i>Unemaeaceae</i>    | <i>Unemaeae</i> Tedersoo   |

---
